# Supplementary material for: Ecosystem integration: the use of ontologies in integrating knowledge across manufacturing value networks
Source: Frontiers journal article supplement (doi:10.3389/fmtec.2024.1331197), 2024-03-21
Supplement: Data_Sheet_1.docx [file Data_Sheet_1.docx]

Appendix 1: Ontology Engineering Tools

This appendix contains links for each category presented in Figure 2. These classifications and definitions have been taken from Poveda-Villalón et al. (2022).

- Concept extractor
  - Word cloud systems: https://www.wordclouds.com/
  - Entity recognition: https://huggingface.co/dslim/bert-large-NER
- Test specification / Test executor
  - THEMIS: http://themis.linkeddata.es/
  - TDD Onto2: https://github.com/kierendavies/tddonto2
- General docs
  - Tables
    - OpenOffice http://www.openoffice.org/
    - Google Drive https://www.google.com/drive
    - MS Office https://www.office.com/
  - Documents
    - OpenOffice http://www.openoffice.org/
    - Google Drive https://www.google.com/drive
    - MS Office https://www.office.com/
  - Mindmaps
    - Miro https://miro.com/mind-map/
    - Mural https://www.mural.co
    - Coggle <https://coggle.it/>
- Ontology editor
  - Protégé: https://protegewiki.stanford.edu/wiki/ProtegeDesktopUserDocs
  - WebProtégé: https://protegewiki.stanford.edu/wiki/WebProtege
  - Fluent Editor: https://www.cognitum.eu/semantics/FluentEditor/
  - TopBraid Composer: https://archive.topquadrant.com/topbraid-composer-install/
  - PoolParty: https://www.poolparty.biz/
  - CAMEO: https://www.3ds.com/products-services/catia/products/no-magic/cameo-systems-modeler/
  - SousLeSens: https://souslesens.enit.fr
- (Visual) Drafting
  - Chowlk: https://chowlk.linkeddata.es/
  - crowd-tool: https://crowd-app.fi.uncoma.edu.ar/
  - Menthor Editor: https://ontouml.org/ontouml/tooling/
  - OntoPanel: https://github.com/yuechenbam/yuechenbam.github.io
  - OWBO: https://github.com/mdaquin/OWBO
  - DiTTO: https://essepuntato.it/ditto/
  - Gra.fo: https://gra.fo/
- Ontology Design Pattern Reuse
  - Reasonable Ontology Templates (OTTR): https://ottr.xyz/
  - ODP Portal: http://ontologydesignpatterns.org/wiki/Main_Page
- Modularizer
  - Ontofox: https://ontofox.hegroup.org/
- Matcher
  - Alignment Cubes: https://www.ida.liu.se/%7Epatla00/research/AlignmentCubes/
- Visualizer
  - WebVOWL: http://vowl.visualdataweb.org/webvowl.html
- Repository
  - IndustryPortal: http://industryportal.enit.fr/
  - LOV: https://lov.linkeddata.es
  - BARTOC: https://bartoc.org/
  - Ontohub: https://ontohub.org/
  - LOV4IoT: https://lov4iot.appspot.com/
  - BioPortal: https://bioportal.bioontology.org/
  - OntoBee: https://ontobee.org/
  - AgroPortal: http://agroportal.lirmm.fr/
  - ODP Portal: http://ontologydesignpatterns.org/wiki/Main_Page
  - DBpedia Archivo: https://archivo.dbpedia.org/list
  - Ontology Lookup Service (OLS) : https://www.ebi.ac.uk/ols/index
- Validator
  - OOPS!: https://oops.linkeddata.es/
  - ASTREA: https://astrea.linkeddata.es/
  - Shaclgen: https://pypi.org/project/shaclgen/
  - Shape designer: https://gitlab.inria.fr/jdusart/shexjapp
- Reasoner
  - Pellet: https://github.com/stardog-union/pellet
  - Fact++: http://owl.cs.manchester.ac.uk/tools/fact/
  - Hermit: http://www.hermit-reasoner.com/
  - Konclude: https://www.derivo.de/en/produkte/konclude.html
  - ORMiE: https://gitlab.inf.unibz.it/franconi/ormie-release/
  - Hets: https://github.com/spechub/Hets
- Documenter
  - WIDOCO: https://dgarijo.github.io/Widoco/doc/tutorial/
  - LODE: https://essepuntato.it/lode/
  - pyLODE: https://github.com/RDFLib/pyLODE
- Publication Server
  - Web servers: General web server to manage web domains.
  - w3id: https://w3id.org/
  - purl: https://purl.archive.org/
- Ontology FAIR validator
  - FOOPS!: https://w3id.org/foops/
  - O’FAIRE: https://github.com/agroportal/fairness
- Issue tracking
  - GitHub: https://github.com/
  - GitLab: https://about.gitlab.com/
  - Jira: https://www.atlassian.com/software/jira
  - Mantis: https://www.mantisbt.org/
- Versioning
  - ontology-toolkit: https://github.com/semanticarts/ontology-toolkit
- Populator
  - LinkML : https://linkml.io/
  - OpenRefine: https://github.com/OpenRefine/OpenRefine
  - LODRefine: https://github.com/sparkica/LODRefine
  - OntoRefine: https://www.ontotext.com/products/ontotext-refine/
  - R2RML: https://www.w3.org/TR/r2rml/
  - RML: https://rml.io/specs/rml/
  - YARRML: https://rml.io/yarrrml/
  - Matey: https://rml.io/yarrrml/matey/
  - Helio: https://oeg-upm.github.io/helio/
  - Karma: https://usc-isi-i2.github.io/karma/
  - MORPH: https://morph.oeg.fi.upm.es/
  - SPARQL-generate: https://ci.mines-stetienne.fr/sparql-generate/
  - excel2RDF: https://pypi.org/project/excel2rdf/
  - mimir: https://github.com/mimir-org
- Constraints validator
  - ASTREA: https://astrea.linkeddata.es/
  - Shaclgen: https://pypi.org/project/shaclgen/
  - Shape designer: https://gitlab.inria.fr/jdusart/shexjapp
- Triple Store / Publisher
  - AllegroGraph: https://allegrograph.com/products/allegrograph/
  - GraphDB: https://graphdb.ontotext.com/
  - Virtuoso: https://virtuoso.openlinksw.com/
  - GRUFF: https://allegrograph.com/products/gruff/
  - IntelligentGraph: https://github.com/peterjohnlawrence/com.inova8.intelligentgraph/tree/master/olgap
  - Helio: https://oeg-upm.github.io/helio/
  - LUPOSDATE: https://github.com/luposdate/luposdate
  - Ontop: https://ontop-vkg.org/
  - RDFox: https://www.oxfordsemantic.tech/
  - Stardog: https://www.stardog.com/
  - WIMU: http://wimu.aksw.org/
  - YASGUI: https://github.com/TriplyDB/Yasgui
- Data FAIR validator
  - F-UJI: https://www.f-uji.net/
- APIs
  - Apache Jena: https://jena.apache.org/
  - OData2SPARQL: https://inova8.com/bg_inova8.com/offerings/odata2sparql/
  - Ontospy: http://lambdamusic.github.io/Ontospy/
  - OWL API: http://owlcs.github.io/owlapi/
  - Owlready2: https://owlready2.readthedocs.io/en/v0.35/
  - EMMOntoPy: https://emmo-repo.github.io/EMMO-python
  - Pronto: https://github.com/althonos/pronto
  - RDF4J: https://rdf4j.org/
  - RDFLib: https://rdflib.readthedocs.io/en/stable/
  - ROBOT: http://robot.obolibrary.org/
- Project management, version management and issue tracking
  - Ontology development oriented
    - OnToology: http://ontoology.linkeddata.es/
    - VocBench: https://ec.europa.eu/isa2/solutions/vocbench3_en
    - VoCol: https://vocol.iais.fraunhofer.de//
    - CENtree: https://www.scibite.com/platform/centree-ontology-management-platform/
  - General or software-oriented
    - GitHub : https://github.com/
    - GitLab: https://about.gitlab.com/
    - Jira: https://www.atlassian.com/software/jira
    - Mantis: https://www.mantisbt.org/
  - Communication tools
    - Zoom: https://zoom.us/
    - Google Meet: https://meet.google.com/
    - Jitsi Meet: https://meet.jit.si/
    - Teams: https://www.microsoft.com/en/microsoft-teams/group-chat-software
    - Skype: https://www.skype.com
    - Webex: <https://www.webex.com/>
    - GoToMeeting: https://www.goto.com/
